# Supplementary material
Source: PubMed Central journal article supplement (PMC6286250)

Supplementary Figure 2. Linkage Disequilibrium (D') among ADH SNPs with  $p < 10^{-6}$ .

A.

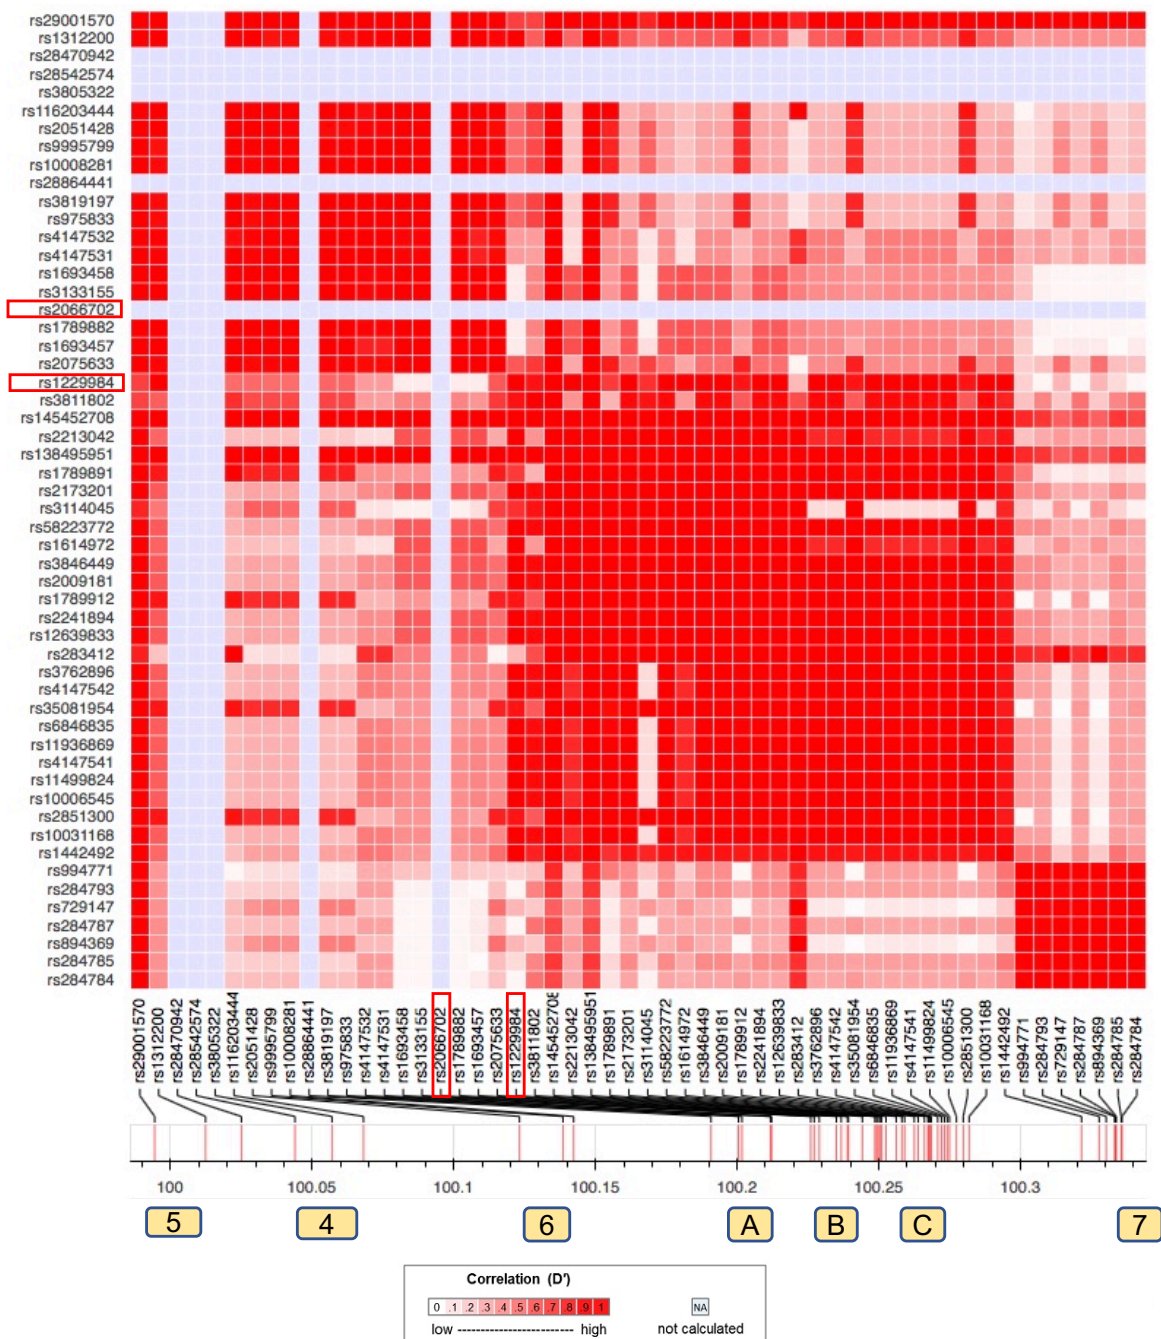

Supplementary Figure 2. Linkage Disequilibrium (D') among ADH SNPs with  $p < 10^{-6}$ . D' among SNPs in the ADH region from Supplementary Table 1 (3 SNPs at a distance were omitted to allow good visualization) was calculated and plotted using LDlink for 3 major population groups: A. European populations. B. East Asian populations. C. African populations. The locations of ADH genes are shown below, along with position of the SNPs along chromosome 4. Rs1229984 and rs2066702 are boxed.

B.

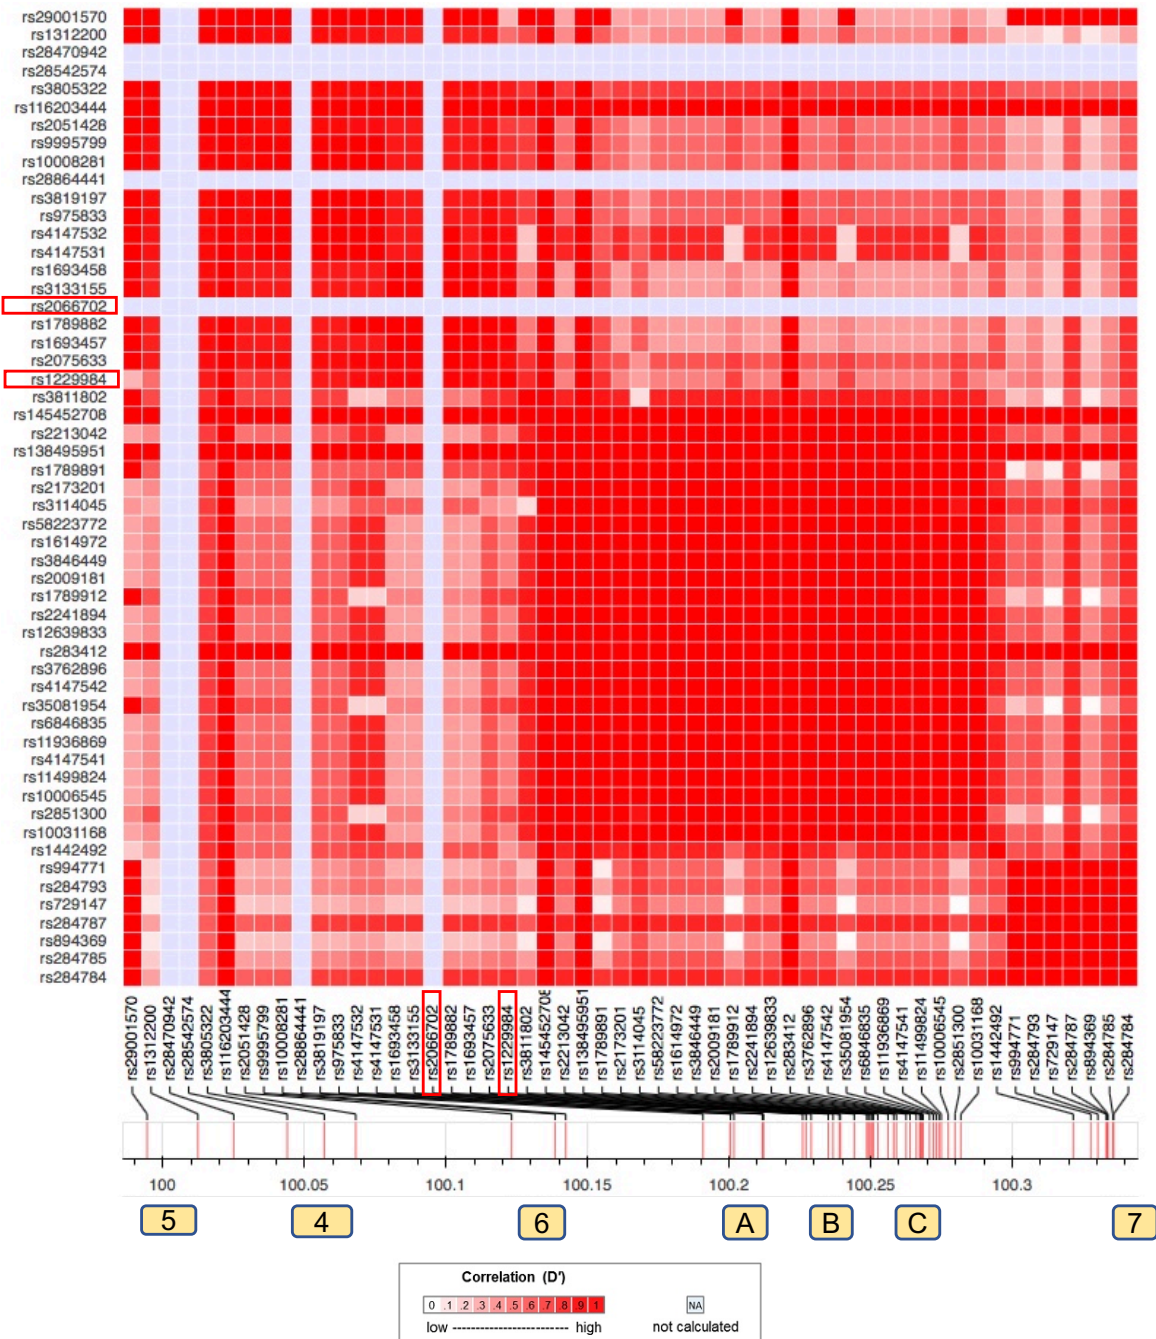

C.

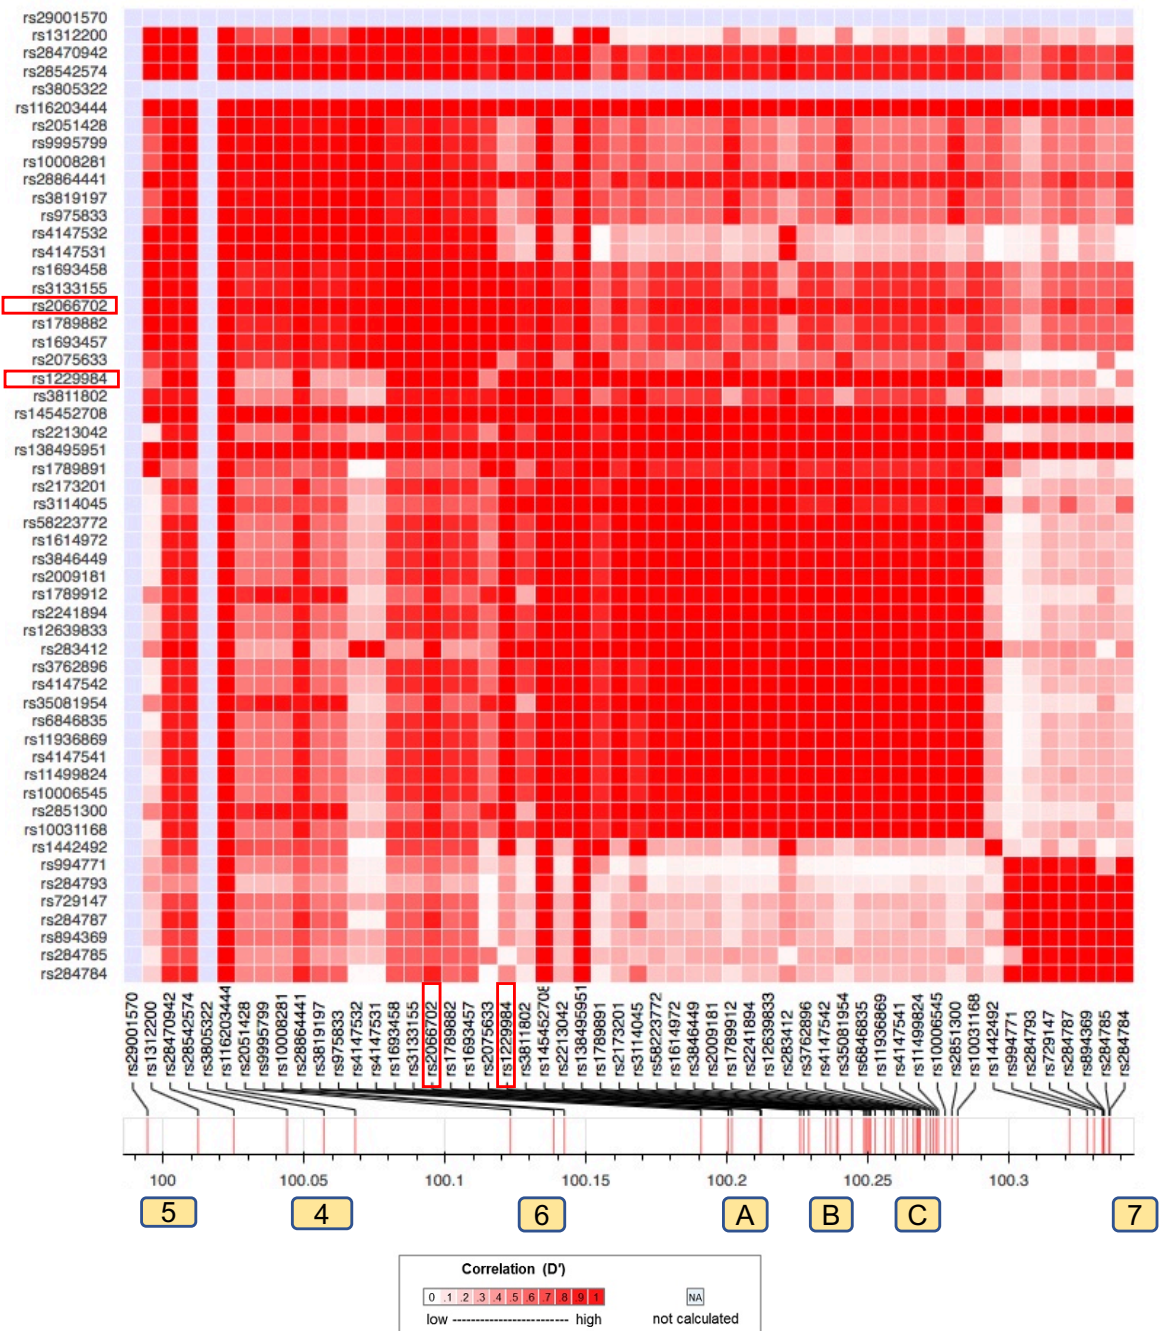

Supplement: NIHMS993146-supplement-Supp_FigS2.pdf [file NIHMS993146-supplement-Supp_FigS2.pdf]
