# Supplementary material
Source: PubMed Central journal article supplement (PMC6286250)
Supplement: NIHMS993146-supplement-Supp_FigS3.pdf [file NIHMS993146-supplement-Supp_FigS3.pdf]

Supplementary Figure 3. Linkage Disequilibrium (D') among ALDH SNPs with  $p < 5 \times 10^{-8}$ .

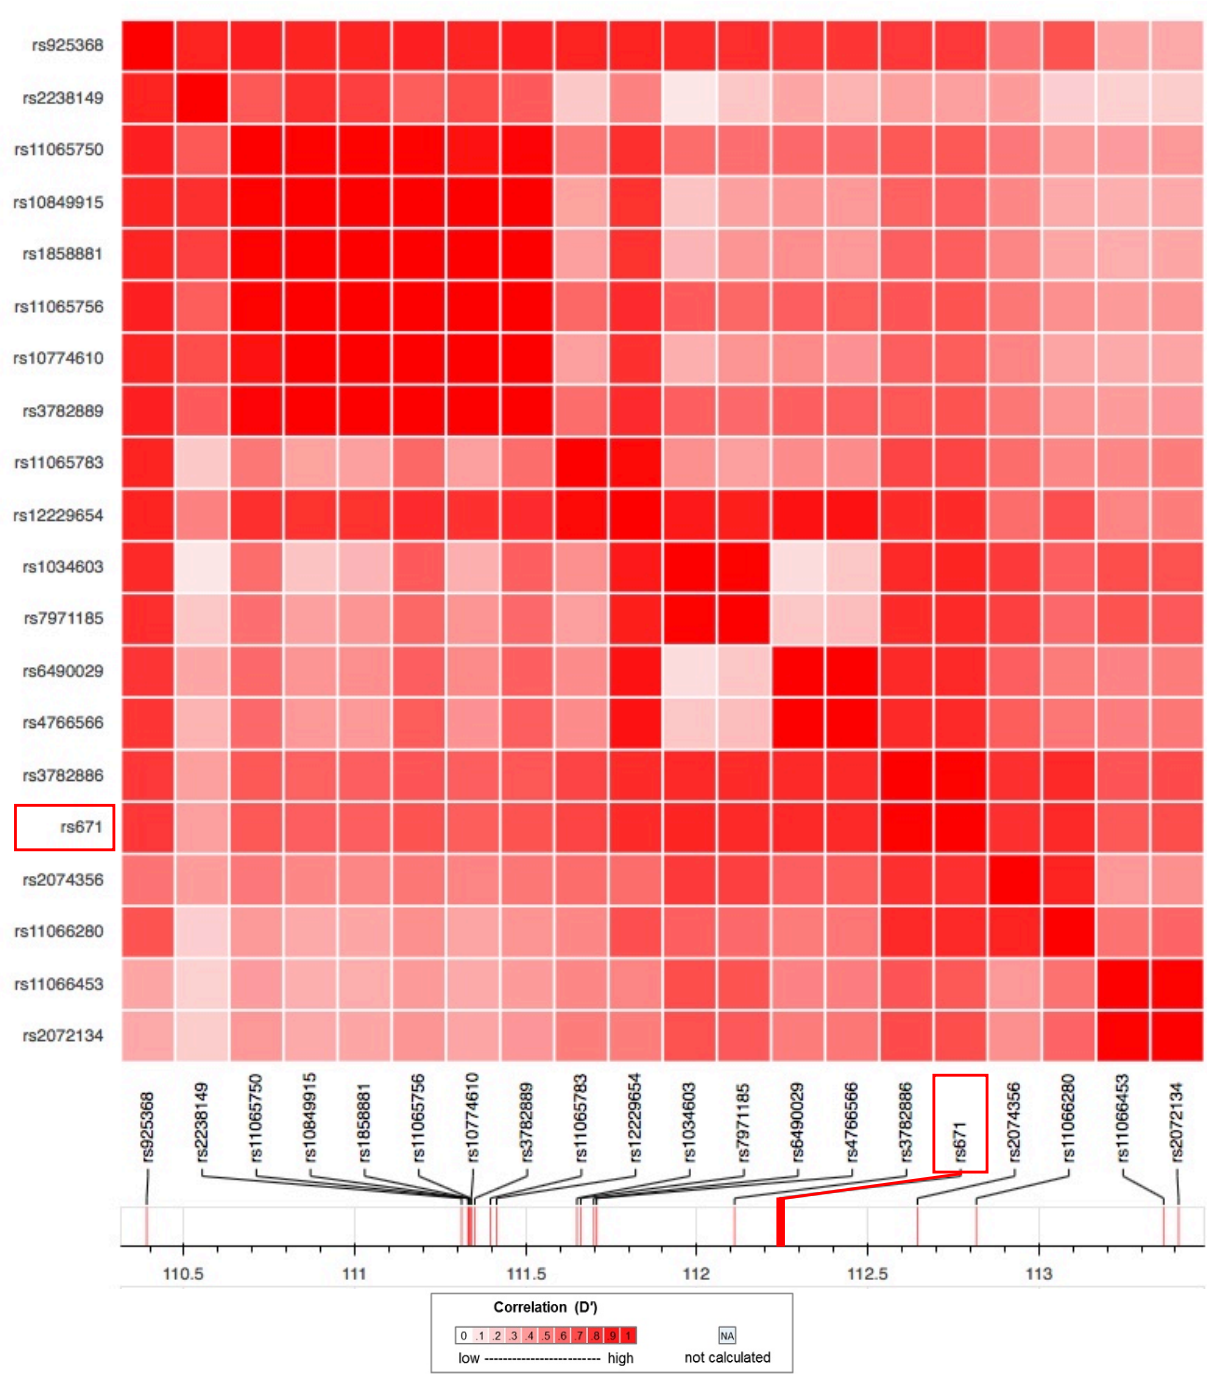

Supplementary Figure 3. Linkage Disequilibrium (D') among ALDH SNPs with  $p < 5 \times 10^{-8}$ . D' among SNPs in the ALDH region from Supplementary Table 2 was calculated and plotted using LDlink for East Asian populations. Rs671 is boxed.
