# Supplementary material
Source: PubMed Central journal article supplement (PMC6286250)
Supplement: NIHMS993146-supplement-Supp_TableS1.pdf [file NIHMS993146-supplement-Supp_TableS1.pdf]

Suppl Table 1 ADH GWAS results.xlsx

| SNP         | Position   | Gene          | Trait               | Pvalue          | OddsRatio        | Population  | First Author | Year | PMID/bioRxiv    |
|-------------|------------|---------------|---------------------|-----------------|------------------|-------------|--------------|------|-----------------|
| rs10031423  | 94,662,676 | <i>PDLIM5</i> | AD (DSMIV)          | <b>2.01E-08</b> |                  | Eur         | Gelernter    | 2014 | 24166409        |
| rs149127347 | 98,179,856 |               | Consumption         | <b>4.42E-09</b> |                  | UKB         | Clarke       | 2017 | 28937693        |
| rs193099203 | 98,708,866 |               | Consumption         | <b>3.78E-25</b> |                  | UKB         | Clarke       | 2017 | 28937693        |
| rs58521602  | 99,009,589 | <i>METAP1</i> | AD (DSMIV)          | <b>3.35E-08</b> |                  | AA          | Gelernter    | 2014 | 24166409        |
| rs58521602  | 99,009,589 | <i>METAP1</i> | AD (DSMIV)          | <b>3.35E-08</b> |                  | Eur+AA meta | Gelernter    | 2014 | 24166409        |
| rs139164451 | 99,064,200 |               | AD (DSMIV)          | <b>5.13E-09</b> |                  | AA          | Gelernter    | 2014 | 24166409        |
| rs139164451 | 99,064,200 |               | AD (DSMIV)          | <b>5.13E-09</b> |                  | Eur+AA meta | Gelernter    | 2014 | 24166409        |
| rs29001570  | 99,073,254 | <i>ADH5</i>   | Consumption         | <b>9.58E-19</b> |                  | UKB         | Clarke       | 2017 | 28937693        |
| rs1312200   | 99,091,206 |               | AD (DSMIV)          | <b>3.93E-08</b> | 1.67 (1.39–2.01) | Korean      | Park         | 2013 | 23456092        |
| rs28470942  | 99,103,864 |               | AD (DSMIV)          | <b>1.91E-11</b> |                  | AA          | Gelernter    | 2014 | 24166409        |
| rs28470942  | 99,103,864 |               | AD (DSMIV)          | <b>1.91E-11</b> |                  | Eur+AA meta | Gelernter    | 2014 | 24166409        |
| rs28542574  | 99,122,782 |               | AD (DSMIV)          | <b>3.62E-11</b> |                  | AA          | Gelernter    | 2014 | 24166409        |
| rs28542574  | 99,122,782 |               | AD (DSMIV)          | <b>3.62E-11</b> |                  | Eur+AA meta | Gelernter    | 2014 | 24166409        |
| rs4148888   | 99,133,041 | <i>ADH4</i>   | AD (DSMIV)          | 7.94E-08        | 1.65 (1.37–1.99) | Korean      | Park         | 2013 | 23456092        |
| rs4148887   | 99,134,711 | <i>ADH4</i>   | AD (DSMIV)          | 1.22E-07        | 1.64 (1.36–1.98) | Korean      | Park         | 2013 | 23456092        |
| rs3805322   | 99,135,847 | <i>ADH4</i>   | AD (DSMIV)          | <b>2.01E-13</b> | 1.92 (1.60–2.29) | Korean      | Park         | 2013 | 23456092        |
| rs4140388   | 99,144,583 | <i>ADH4</i>   | AD (DSMIV)          | 1.33E-07        | 1.64 (1.36–1.98) | Korean      | Park         | 2013 | 23456092        |
| rs3762894   | 99,144,933 | <i>ADH4</i>   | AD (DSMIV)          | 1.49E-07        | 1.64 (1.36–1.97) | Korean      | Park         | 2013 | 23456092        |
| rs4148883   | 99,145,181 |               | AD (DSMIV)          | 1.29E-07        | 1.64 (1.36–1.98) | Korean      | Park         | 2013 | 23456092        |
| rs116203444 | 99,146,962 |               | AD (DSMIV)          | <b>2.46E-09</b> |                  | Eur         | Gelernter    | 2014 | 24166409        |
| rs116203444 | 99,146,962 |               | AD (DSMIV)          | <b>2.46E-09</b> |                  | Eur+AA meta | Gelernter    | 2014 | 24166409        |
| rs2051428   | 99,202,029 |               | AD (DSMIV)          | <b>2.50E-10</b> | 1.84 (1.52–2.24) | Korean      | Park         | 2013 | 23456092        |
| rs3857224   | 99,208,528 | <i>ADH6</i>   | AD (DSMIV, DSMIIIR) | 5.86E-07        |                  | AA          | Walters      | 2018 | bioRxiv: 257311 |
| rs9995799   | 99,217,381 | <i>ADH6</i>   | AD (DSMIV)          | <b>4.54E-12</b> | 1.96 (1.61–2.38) | Korean      | Park         | 2013 | 23456092        |
| rs10008281  | 99,221,145 |               | AD (DSMIV)          | <b>6.25E-12</b> | 1.95 (1.60–2.37) | Korean      | Park         | 2013 | 23456092        |
| rs12510722  | 99,225,944 |               | AD (DSMIV)          | 7.87E-07        | 1.8 (1.42–2.28)  | Korean      | Park         | 2013 | 23456092        |
| rs2173199   | 99,250,222 |               | AD (DSMIV)          | 7.87E-07        | 1.8 (1.42–2.28)  | Korean      | Park         | 2013 | 23456092        |
| rs6532814   | 99,252,811 |               | AD (DSMIV)          | 7.87E-07        | 1.8 (1.42–2.28)  | Korean      | Park         | 2013 | 23456092        |
| rs28864441  | 99,269,648 |               | AD (DSMIV)          | <b>1.06E-12</b> |                  | AA          | Gelernter    | 2014 | 24166409        |
| rs28864441  | 99,269,648 |               | AD (DSMIV)          | <b>1.06E-12</b> |                  | Eur+AA meta | Gelernter    | 2014 | 24166409        |
| rs12512110  | 99,274,658 |               | AD (DSMIV)          | 9.39E-08        | 2.08 (1.58–2.75) | Korean      | Park         | 2013 | 23456092        |
| rs3819197   | 99,279,352 | <i>ADH1A</i>  | AD (DSMIV)          | <b>1.12E-14</b> | 2.15 (1.76–2.63) | Korean      | Park         | 2013 | 23456092        |
| rs975833    | 99,280,582 | <i>ADH1A</i>  | AD (DSMIV)          | <b>1.12E-14</b> | 2.15 (1.76–2.63) | Korean      | Park         | 2013 | 23456092        |
| rs12508502  | 99,282,019 | <i>ADH1A</i>  | AD (DSMIV)          | 1.02E-07        | 2.08(1.57–2.74)  | Korean      | Park         | 2013 | 23456092        |
| rs2276332   | 99,282,290 | <i>ADH1A</i>  | AD (DSMIV)          | 7.02E-08        | 2.10(1.59–2.78)  | Korean      | Park         | 2013 | 23456092        |
| rs4147532   | 99,290,629 | <i>ADH1A</i>  | AD (DSMIV)          | <b>1.60E-09</b> | 2.11 (1.64–2.71) | Korean      | Park         | 2013 | 23456092        |
| rs4147531   | 99,291,040 | <i>ADH1A</i>  | AD (DSMIV)          | <b>1.45E-09</b> | 2.11 (1.64–2.71) | Korean      | Park         | 2013 | 23456092        |
| rs1693458   | 99,304,835 |               | AD (DSMIV)          | <b>1.09E-09</b> |                  | AA          | Gelernter    | 2014 | 24166409        |

Suppl Table 1 ADH GWAS results.xlsx

| SNP         | Position   | Gene    | Trait               | Pvalue          | OddsRatio         | Population       | First Author  | Year | PMID/bioRxiv    |
|-------------|------------|---------|---------------------|-----------------|-------------------|------------------|---------------|------|-----------------|
| rs3133155   | 99,306,055 | ADH1B   | AD (DSMIV)          | <b>1.13E-09</b> |                   | AA               | Gelernter     | 2014 | 24166409        |
| rs2066702   | 99,307,860 | ADH1B*3 | AD (DSMIV)          | <b>2.24E-13</b> |                   | AA               | Gelernter     | 2014 | 24166409        |
| rs2066702   | 99,307,860 | ADH1B*3 | AD (DSMIV, DSMIIIR) | <b>2.21E-09</b> |                   | AA               | Walters       | 2018 | bioRxiv: 257311 |
| rs2066702   | 99,307,860 | ADH1B*3 | AD (DSMIV)          | <b>2.24E-13</b> |                   | Eur+AA meta      | Gelernter     | 2014 | 24166409        |
| rs2066702   | 99,307,860 | ADH1B*3 | AD (DSMIV, DSMIIIR) | <b>2.21E-09</b> |                   | Eur+AA meta      | Walters       | 2018 | bioRxiv: 257311 |
| rs2066702   | 99,307,860 | ADH1B*3 | Maxdrinks           | <b>2.50E-10</b> |                   | AA               | Xu            | 2015 | 26036284        |
| rs1789882   | 99,313,896 | ADH1B   | AD (DSMIV)          | <b>1.39E-09</b> |                   | AA               | Gelernter     | 2014 | 24166409        |
| rs1693457   | 99,315,605 | ADH1B   | AD (DSMIV)          | <b>1.51E-09</b> |                   | AA               | Gelernter     | 2014 | 24166409        |
| rs2075633   | 99,317,841 | ADH1B   | AD (DSMIV)          | <b>6.67E-14</b> | 2.11 (1.72–2.59)  | Korean           | Park          | 2013 | 23456092        |
| rs1229984   | 99,318,162 | ADH1B*2 | AD (DSMIV)          | <b>2.91E-18</b> |                   | Eur              | Gelernter     | 2014 | 24166409        |
| rs1229984   | 99,318,162 | ADH1B*2 | AD (DSMIV, DSMIIIR) | <b>9.79E-13</b> |                   | Eur              | Walters       | 2018 | bioRxiv: 257311 |
| rs1229984   | 99,318,162 | ADH1B*2 | AD (DSMIV)          | <b>6.57E-10</b> | 0.34 (0.24, 0.48) | Eur+AA meta      | Beirut        | 2012 | 21968928        |
| rs1229984   | 99,318,162 | ADH1B*2 | AD (DSMIV)          | <b>6.03E-09</b> | 0.29 (0.10, 0.85) | Eur+AA meta      | Beirut        | 2012 | 21968928        |
| rs1229984   | 99,318,162 | ADH1B*2 | AD (DSMIV)          | <b>2.91E-18</b> |                   | Eur+AA meta      | Gelernter     | 2014 | 24166409        |
| rs1229984   | 99,318,162 | ADH1B*2 | AD (DSMIV, DSMIIIR) | <b>2.80E-11</b> |                   | Eur+AA meta      | Walters       | 2018 | bioRxiv: 257311 |
| rs1229984   | 99,318,162 | ADH1B*2 | AD (DSMIV)          | <b>2.63E-21</b> | 2.35 (1.95–2.84)  | Korean           | Park          | 2013 | 23456092        |
| rs1229984   | 99,318,162 | ADH1B*2 | AUDIT-P             | <b>9.90E-46</b> |                   | Eur (23+UKB)     | Sanchez-Roige | 2018 | bioRxiv: 275917 |
| rs1229984   | 99,318,162 | ADH1B*2 | AUDIT-C             | <b>2.60E-56</b> |                   | Eur (23+UKB)     | Sanchez-Roige | 2018 | bioRxiv: 275917 |
| rs1229984   | 99,318,162 | ADH1B*2 | Maxdrinks           | <b>5.96E-15</b> |                   | Eur              | Xu            | 2015 | 26036284        |
| rs1229984   | 99,318,162 | ADH1B*2 | Maxdrinks           | <b>3.24E-13</b> |                   | Eur+AA meta      | Beirut        | 2012 | 21968928        |
| rs1229984   | 99,318,162 | ADH1B*2 | Maxdrinks           | 4.61E-07        |                   | Eur+AA meta      | Beirut        | 2012 | 21968928        |
| rs1229984   | 99,318,162 | ADH1B*2 | Consumption         | <b>1.91E-35</b> | 0.79 (0.74–0.84)  | Eur Non-Hispanic | Jorgenson     | 2017 | 28485404        |
| rs1229984   | 99,318,162 | ADH1B*2 | Drinker/non-drinker | 4.35E-07        | 0.72 (0.59–0.85)  | Hispanic/Latino  | Jorgenson     | 2017 | 28485404        |
| rs1229984   | 99,318,162 | ADH1B*2 | Drinker/non-drinker | <b>2.47E-20</b> | 0.79 (0.74–0.84)  | Eur Non-Hispanic | Jorgenson     | 2017 | 28485404        |
| rs3811802   | 99,323,064 |         | AD (DSMIV, DSMIIIR) | <b>2.40E-08</b> |                   | Eur              | Walters       | 2018 | bioRxiv: 257311 |
| rs3811802   | 99,323,064 |         | AUDIT-P             | <b>5.30E-11</b> |                   | Eur (23+UKB)     | Sanchez-Roige | 2018 | bioRxiv: 275917 |
| rs145452708 | 99,327,485 |         | Consumption         | <b>1.15E-30</b> |                   | UKB              | Clarke        | 2017 | 28937693        |
| rs2213042   | 99,328,053 |         | AD (DSMIV)          | <b>1.49E-08</b> |                   | AA               | Gelernter     | 2014 | 24166409        |
| rs138495951 | 99,328,569 |         | AUDIT total         | <b>5.70E-36</b> |                   | Eur (23+UKB)     | Sanchez-Roige | 2018 | bioRxiv: 275917 |
| rs1789891   | 99,329,262 |         | AD (DSMIV)          | <b>1.64E-08</b> |                   | German           | Treutlein     | 2017 | 28714907        |
| rs1789891   | 99,329,262 |         | AD (DSMIV)          | <b>1.27E-08</b> | 1.46 (1.28–1.67)  | German           | Frank         | 2010 | 22004471        |
| rs2173201   | 99,329,813 |         | AD (DSMIV)          | <b>2.39E-09</b> |                   | AA               | Gelernter     | 2014 | 24166409        |
| rs2173201   | 99,329,813 |         | AD (DSMIV)          | 4.56E-07        |                   | Eur+AA meta      | Gelernter     | 2014 | 24166409        |
| rs1229863   | 99,331,229 |         | AD (DSMIV, DSMIIIR) | 7.80E-07        |                   | Eur              | Walters       | 2018 | bioRxiv: 257311 |
| rs3114045   | 99,331,403 |         | AUDIT total         | <b>6.50E-13</b> |                   | Eur (23+UKB)     | Sanchez-Roige | 2018 | bioRxiv: 275917 |
| rs58223772  | 99,335,008 |         | AD (DSMIV)          | <b>3.46E-09</b> |                   | AA               | Gelernter     | 2014 | 24166409        |
| rs58223772  | 99,335,008 |         | AD (DSMIV)          | 2.67E-07        |                   | Eur+AA meta      | Gelernter     | 2014 | 24166409        |
| rs1614972   | 99,336,998 | ADH1C   | AD (DSMIV)          | <b>2.70E-08</b> |                   | AA               | Gelernter     | 2014 | 24166409        |

Suppl Table 1 ADH GWAS results.xlsx

| SNP         | Position   | Gene  | Trait               | Pvalue          | OddsRatio        | Population    | First Author  | Year | PMID/bioRxiv    |
|-------------|------------|-------|---------------------|-----------------|------------------|---------------|---------------|------|-----------------|
| rs3846449   | 99,337,969 | ADH1C | AD (DSMIV)          | <b>1.14E-08</b> |                  | AA            | Gelernter     | 2014 | 24166409        |
| rs141973904 | 99,341,085 | ADH1C | AUDIT total         | 4.40E-07        |                  | Eur           | Sanchez-Roige | 2017 | 29058377        |
| rs141973904 | 99,341,085 | ADH1C | AUDIT total         | 4.40E-07        |                  | Eur (23andMe) | Sanchez-Roige | 2017 | 29058377        |
| rs2009181   | 99,341,390 | ADH1C | AD (DSMIV)          | <b>9.83E-09</b> |                  | AA            | Gelernter     | 2014 | 24166409        |
| rs2009181   | 99,341,390 | ADH1C | AD (DSMIV)          | 9.27E-07        |                  | Eur+AA meta   | Gelernter     | 2014 | 24166409        |
| rs1789912   | 99,342,785 | ADH1C | AD (DSMIV, DSMIIIR) | <b>1.47E-09</b> |                  | Eur+AA meta   | Walters       | 2018 | bioRxiv: 257311 |
| rs2241894   | 99,344,976 | ADH1C | AD (DSMIV)          | <b>9.79E-09</b> |                  | AA            | Gelernter     | 2014 | 24166409        |
| rs2241894   | 99,344,976 | ADH1C | AD (DSMIV)          | 9.20E-07        |                  | Eur+AA meta   | Gelernter     | 2014 | 24166409        |
| rs12639833  | 99,346,215 | ADH1C | AD (DSMIV)          | <b>8.59E-09</b> |                  | AA            | Gelernter     | 2014 | 24166409        |
| rs12639833  | 99,346,215 | ADH1C | AD (DSMIV)          | 8.57E-07        |                  | Eur+AA meta   | Gelernter     | 2014 | 24166409        |
| rs283412    | 99,346,515 | ADH1C | AUDIT-C             | <b>4.10E-08</b> |                  | Eur (23+UKB)  | Sanchez-Roige | 2018 | bioRxiv: 275917 |
| rs3762896   | 99,346,974 | ADH1C | AD (DSMIV)          | <b>3.86E-09</b> |                  | AA            | Gelernter     | 2014 | 24166409        |
| rs4147542   | 99,347,396 | ADH1C | AD (DSMIV)          | <b>9.14E-09</b> |                  | AA            | Gelernter     | 2014 | 24166409        |
| rs35081954  | 99,349,662 | ADH1C | Consumption         | <b>2.14E-09</b> |                  | UKB           | Clarke        | 2017 | 28937693        |
| rs6846835   | 99,350,990 | ADH1C | AD (DSMIV)          | <b>9.51E-09</b> |                  | AA            | Gelernter     | 2014 | 24166409        |
| rs11936869  | 99,352,016 | ADH1C | AD (DSMIV)          | <b>1.03E-08</b> |                  | AA            | Gelernter     | 2014 | 24166409        |
| rs4147541   | 99,353,000 | ADH1C | AD (DSMIV)          | <b>1.06E-08</b> |                  | AA            | Gelernter     | 2014 | 24166409        |
| rs1789924   | 99,353,129 |       | AD (DSMIV)          | 1.92E-07        | 1.3 (1.18–1.44)  | German        | Frank         | 2010 | 22004471        |
| rs11499824  | 99,353,826 |       | AD (DSMIV)          | <b>7.25E-09</b> |                  | AA            | Gelernter     | 2014 | 24166409        |
| rs10006545  | 99,356,275 |       | AD (DSMIV)          | <b>4.21E-09</b> |                  | AA            | Gelernter     | 2014 | 24166409        |
| rs2851300   | 99,358,667 |       | AD (DSMIV)          | 1.04E-07        | 1.31 (1.19–1.45) | German        | Frank         | 2010 | 22004471        |
| rs2851300   | 99,358,667 |       | AD (DSMIV)          | <b>9.88E-10</b> | 2.88 (2.00–4.16) | Korean        | Park          | 2013 | 23456092        |
| rs10031168  | 99,360,736 |       | AD (DSMIV)          | <b>4.57E-09</b> |                  | AA            | Gelernter     | 2014 | 24166409        |
| rs1154445   | 99,367,364 |       | AD (DSMIV, DSMIIIR) | 1.80E-07        |                  | Eur           | Walters       | 2018 | bioRxiv: 257311 |
| rs6827898   | 99,374,706 |       | AD (DSMIV, DSMIIIR) | 5.21E-07        |                  | Eur           | Walters       | 2018 | bioRxiv: 257311 |
| rs1372679   | 99,383,373 |       | AD (DSMIV)          | 2.19E-07        | 2.47 (1.72–3.53) | Korean        | Park          | 2013 | 23456092        |
| rs894368    | 99,388,156 |       | AD (DSMIV, DSMIIIR) | <b>1.93E-08</b> |                  | Eur           | Walters       | 2018 | bioRxiv: 257311 |
| rs4699748   | 99,400,286 |       | AD (DSMIV)          | 2.51E-07        | 1.49 (1.28–1.73) | German        | Frank         | 2010 | 22004471        |
| rs4699748   | 99,400,286 |       | AD (DSMIV)          | 1.69E-07        | 2.5 (1.74–3.59)  | Korean        | Park          | 2013 | 23456092        |
| rs1442492   | 99,400,438 |       | AD (DSMIV)          | <b>2.01E-16</b> | 2.22 (1.82–2.71) | Korean        | Park          | 2013 | 23456092        |
| rs994771    | 99,406,646 |       | AD (DSMIV)          | <b>4.76E-11</b> | 1.92 (1.57–2.34) | Korean        | Park          | 2013 | 23456092        |
| rs284793    | 99,409,137 |       | AD (DSMIV)          | <b>2.99E-12</b> | 1.98 (1.62–2.41) | Korean        | Park          | 2013 | 23456092        |
| rs729147    | 99,412,110 | ADH7  | AD (DSMIV)          | <b>3.84E-11</b> | 1.98 (1.61–2.45) | Korean        | Park          | 2013 | 23456092        |
| rs284787    | 99,412,399 | ADH7  | AD (DSMIV)          | <b>1.75E-15</b> | 2.07 (1.72–2.49) | Korean        | Park          | 2013 | 23456092        |
| rs894369    | 99,412,689 | ADH7  | AD (DSMIV)          | <b>3.84E-11</b> | 1.98 (1.61–2.45) | Korean        | Park          | 2013 | 23456092        |
| rs284785    | 99,414,429 | ADH7  | AD (DSMIV)          | <b>6.39E-12</b> | 1.95 (1.61–2.38) | Korean        | Park          | 2013 | 23456092        |
| rs284784    | 99,414,717 | ADH7  | AD (DSMIV)          | <b>2.43E-15</b> | 2.06 (1.71–2.48) | Korean        | Park          | 2013 | 23456092        |
