# Supplementary material
Source: PubMed Central journal article supplement (PMC6286250)
Supplement: NIHMS993146-supplement-Supp_TableS2.pdf [file NIHMS993146-supplement-Supp_TableS2.pdf]

Suppl Table 2 ALDH GWAS results.xlsx

| SNP          | Position    | Gene <sup>a</sup> | D'   | Trait                      | Pvalue    | Population        | First Auth | Year | PMID/bioRxiv |
|--------------|-------------|-------------------|------|----------------------------|-----------|-------------------|------------|------|--------------|
| rs925368     | 109,953,174 | <i>GIT2</i>       | 0.77 | Flushing                   | 1.55E-08  | Chinese           | Quillen    | 2013 | 24277619     |
| rs925368     | 109,953,174 | <i>GIT2</i>       | 0.77 | Maxdrinks                  | 5.52E-08  | Chinese           | Quillen    | 2013 | 24277619     |
| rs2238149    | 110,874,125 | <i>CCDC63</i>     | 0.51 | Consumption                | 1.14E-14  | Korean males      | Baik       | 2011 | 21270382     |
| rs2238149    | 110,874,125 | <i>CCDC63</i>     | 0.51 | Flushing                   | 2.02E-08  | Chinese           | Quillen    | 2013 | 24277619     |
| rs11065750   | 110,893,212 | <i>CCDC63</i>     | 0.64 | Flushing                   | 1.01E-14  | Chinese           | Quillen    | 2013 | 24277619     |
| rs11065750   | 110,893,212 | <i>CCDC63</i>     | 0.64 | Maxdrinks                  | 3.08E-10  | Chinese           | Quillen    | 2013 | 24277619     |
| rs10849915   | 110,895,818 | <i>CCDC63</i>     | 0.65 | Consumption                | 1.45E-23  | Korean males      | Baik       | 2011 | 21270382     |
| rs1858881    | 110,896,313 | <i>CCDC63</i>     | 0.65 | Flushing                   | 7.77E-15  | Chinese           | Quillen    | 2013 | 24277619     |
| rs1858881    | 110,896,313 | <i>CCDC63</i>     | 0.65 | Maxdrinks                  | 1.74E-09  | Chinese           | Quillen    | 2013 | 24277619     |
| rs11065756   | 110,900,990 | <i>CCDC63</i>     | 0.65 | Consumption                | 1.98E-23  | Korean males      | Baik       | 2011 | 21270382     |
| rs10774610   | 110,902,439 | <i>CCDC63</i>     | 0.65 | Flushing                   | 7.77E-15  | Chinese           | Quillen    | 2013 | 24277619     |
| rs10774610   | 110,902,439 | <i>CCDC63</i>     | 0.65 | Maxdrinks                  | 1.74E-09  | Chinese           | Quillen    | 2013 | 24277619     |
| rs3782889    | 110,912,851 | <i>MYL2</i>       | 0.65 | Consumption                | 1.45E-22  | Korean males      | Baik       | 2011 | 21270382     |
| rs11065783   | 110,958,445 |                   | 0.71 | Consumption                | 2.05E-09  | Korean males      | Baik       | 2011 | 21270382     |
| rs12229654   | 110,976,657 |                   | 0.82 | Consumption                | 3.79E-35  | Korean males      | Baik       | 2011 | 21270382     |
| rs1034603    | 111,211,540 | <i>CUX2</i>       | 0.83 | Flushing                   | 2.99E-08  | Chinese           | Quillen    | 2013 | 24277619     |
| rs7971185    | 111,222,795 | <i>CUX2</i>       | 0.83 | Flushing                   | 2.17E-08  | Chinese           | Quillen    | 2013 | 24277619     |
| rs6490029    | 111,260,653 | <i>CUX2</i>       | 0.84 | Flushing                   | 1.02E-13  | Chinese           | Quillen    | 2013 | 24277619     |
| rs6490029    | 111,260,653 | <i>CUX2</i>       | 0.84 | Maxdrinks                  | 7.11E-10  | Chinese           | Quillen    | 2013 | 24277619     |
| rs4766566    | 111,269,073 | <i>CUX2</i>       | 0.84 | Flushing                   | 7.50E-15  | Chinese           | Quillen    | 2013 | 24277619     |
| rs4766566    | 111,269,073 | <i>CUX2</i>       | 0.84 | Maxdrinks                  | 9.10E-12  | Chinese           | Quillen    | 2013 | 24277619     |
| rs3782886    | 111,672,685 | <i>BRAP</i>       | 0.99 | AD (DSMIV)                 | 4.74E-08  | Chinese           | Quillen    | 2013 | 24277619     |
| rs3782886    | 111,672,685 | <i>BRAP</i>       | 0.99 | Flushing                   | 9.68E-26  | Chinese           | Quillen    | 2013 | 24277619     |
| rs3782886    | 111,672,685 | <i>BRAP</i>       | 0.99 | Maxdrinks                  | 2.02E-16  | Chinese           | Quillen    | 2013 | 24277619     |
| <b>rs671</b> | 111,803,962 | <b>ALDH2</b>      |      | AD (DSMIV)                 | 4.73E-08  | Chinese           | Quillen    | 2013 | 24277619     |
| <b>rs671</b> | 111,803,962 | <b>ALDH2</b>      |      | AD criterion Count (DSMIV) | 5.80E-10  | Thai              | Gelernter  | 2018 | 29460428     |
| <b>rs671</b> | 111,803,962 | <b>ALDH2</b>      |      | Drinker/non-drinker        | 5.17E-35  | Chinese           | Yang       | 2013 | 23364009     |
| <b>rs671</b> | 111,803,962 | <b>ALDH2</b>      |      | Drinker/non-drinker        | 2.28E-72  | East Asians in US | Jorgenson  | 2017 | 28485404     |
| <b>rs671</b> | 111,803,962 | <b>ALDH2</b>      |      | Drinker/non-drinker        | 3.60E-211 | Japanese          | Takeuchi   | 2011 | 21372407     |
| <b>rs671</b> | 111,803,962 | <b>ALDH2</b>      |      | Flushing                   | 4.75E-26  | Chinese           | Quillen    | 2013 | 24277619     |
| <b>rs671</b> | 111,803,962 | <b>ALDH2</b>      |      | Flushing                   | 2.01E-14  | Thai              | Gelernter  | 2018 | 29460428     |
| <b>rs671</b> | 111,803,962 | <b>ALDH2</b>      |      | Maxdrinks                  | 1.54E-16  | Chinese           | Quillen    | 2013 | 24277619     |
| <b>rs671</b> | 111,803,962 | <b>ALDH2</b>      |      | Maxdrinks                  | 1.61E-12  | Thai              | Gelernter  | 2018 | 29460428     |
| rs2074356    | 112,207,597 | <i>HECTD4</i>     | 0.80 | Consumption                | 9.49E-69  | Korean males      | Baik       | 2011 | 21270382     |
| rs11066280   | 112,379,979 | <i>HECTD4</i>     | 0.83 | Consumption                | 9.34E-54  | Korean males      | Baik       | 2011 | 21270382     |
| rs11066280   | 112,379,979 | <i>HECTD4</i>     | 0.83 | Daily drinking             | 4.01E-21  | Chinese           | Yang       | 2013 | 23364009     |
| rs11066280   | 112,379,979 | <i>HECTD4</i>     | 0.83 | Drinker/non-drinker        | 3.26E-215 | Chinese           | Yang       | 2013 | 23364009     |
| rs11066453   | 112,927,816 | <i>OAS1</i>       | 0.64 | Consumption                | 1.11E-13  | Korean males      | Baik       | 2011 | 21270382     |
| rs2072134    | 112,971,371 | <i>OAS3</i>       | 0.68 | Consumption                | 5.70E-17  | Korean males      | Baik       | 2011 | 21270382     |
|              |             |                   |      |                            |           |                   |            |      |              |
|              |             |                   |      |                            |           |                   |            |      |              |

<sup>a</sup>Gene is noted based upon position, but all findings probably represent ALDH2 based upon LD.  
Consumption = ln(average daily consumption)
